# Supplementary material
Source: publisher figshare collection journal article supplement (https://frontiersin.figshare.com/ndownloader/files/34055639)
Supplement: Supplementary file 1 [file 34055639]

## Sheet: Tabelle1
Plot number					Date	Type of habitat	Type of habitat others	Soil colour	Litter available	Vegetation layer			Presence of Deadwood	Vegetation height	Blossoms	Blossoms colour	Crop type	Tree species	Shadowing
		Forest	Habitat	Distance						Herbs, Gras	Shrubs	Canopy
RE-CH1-AGRI-128		CH1	AGRI	128	2021-09-04	Agricultural land		Humus rich (black)	little	>50%	N/A	>75%	N/A	10	medium (50-200)	white, yellow, blue	Manihot esculanta(Cassava), Saccharum officinarum(Sugarcane), Brassica oleracea, Maranta arundinacea	Pinus patula, Persea americana, Eriobotrya japonica, Musa acuminata	no shadow
RE-CH1-AGRI-16		CH1	AGRI	16	2021-09-04	Agricultural land		Humus rich (black)	little	<25%	N/A	N/A	little	10	little (<50)	white	solanum nigrum(Night shade),Brassica oleracea(Sukuma wiki), grasses		no shadow
RE-CH1-AGRI-32		CH1	AGRI	32	2021-09-04	Agricultural land		Humus rich (black)	little	>25%	N/A	N/A	medium	15	little (<50)	white	Passiflora edulis(climber)		no shadow
RE-CH1-AGRI-64		CH1	AGRI	64	2021-09-04	Agricultural land		Humus rich (black)	little	>50%	>25%	>50%	little	15	little (<50)	purple	Ipomoea batata(Sweet potato), Musa acuminata(Banana), Solanum nigrum	Eriobotrya japonica, Persea americana	no shadow
RE-CH1-AGRI-8		CH1	AGRI	8	2021-09-04	Fallow Land		Humus rich (black)	little	100%	>25%	>25%	little	10	medium (50-200)	yellow, pink	Solanum nigrum,Brassica oleracea, Solanum lycopersicum(Tomato), Bidens pilosa		little (<25%)
RE-CH1-E-0		CH1	E	0	2021-09-04	Forest Edge		Humus rich (black)	little	>75%	<25%	>50%	little	10	medium (50-200)	white, yellow	N/A	Eucalyptus saligna, Pinus patula, Tabanaemontana stapfiana,Craibia zimmermanni	little (<25%)
RE-CH1-F-200		CH1	F	-200	2021-09-04	Forest		Humus rich (black)	much	100%	>50%	>75%	medium	20	no	N/A	N/A	Xymalos monospora, Tabanaemontana stapfiana, Psydrax, Lysygium guinensis	much (<75%)
RE-CH1-F-8		CH1	F	-8	2021-09-04	Forest		Humus rich (black)	much	>50%	>75%	>75%	little	15	little (<50)	white, reddish	N/A	Eucalyptus saligna, Pinus patula, Tabanaemontana stapfiana	much (<75%)
RE-CH2-AGRI-128		CH2	AGRI	128	2021-09-04	Agricultural land		Humus rich (black)	no	>50%	>25%	>25%	no	12	little (<50)	white, yellow	Brassica oleracea, Saccharum officinarum	Eriobotrya japonica, psidium guajava	no shadow
RE-CH2-AGRI-16		CH2	AGRI	16	2021-09-04	Agricultural land		Humus rich (black)	little	>25%	N/A	>25%	no	8	little (<50)	purple, white, blue	N/A	Croton megalocarpus	no shadow
RE-CH2-AGRI-32		CH2	AGRI	32	2021-09-04	Fallow Land		Humus rich (black)	little	>75%	N/A	N/A	no	N/A	little (<50)	yellow	N/A	N/A	no shadow
RE-CH2-AGRI-64		CH2	AGRI	64	2021-09-04	Fallow Land		Humus rich (black)	little	>75%	>25%	>75%	no	15	N/A	yellow, white	Maranta arundinacea	Pinus patula, Eucalyptus saligna, Psidium guajava, Croton megalocarpus	little (<25%)
RE-CH2-AGRI-8		CH2	AGRI	8	2021-09-04	Fallow Land		Humus rich (black)	little	>25%	>25%	<25%	N/A	10	little (<50)	white, purple, yellow, pink, red	N/A	Casuarina equisitifolia, Croton megalocarpus, Eucalyptus saligna, Ficus sycomorous	little (<25%)
RE-CH2-E-0		CH2	E	0	2021-09-04	Forest Edge		Humus rich (black)	medium	>75%	>25%	0	little	15	little (<50)	yellow, purple	N/A	Pinus patula, Tabanaemontana stapfiana,Cupressus lusitanica,Polycias fulva	little (<25%)
RE-CH2-F-200		CH2	F	-200	2021-09-04	Forest		Humus rich (black)	much	>25%	100%	>75%	medium	N/A	little (<50)	white	N/A	Tabanaemontana stapfiana, Szygium guineense	much (<75%)
RE-CH2-F-8		CH2	F	-8	2021-09-04	Forest		Humus rich (black)	little	>75%	>75%	100%	much	10	medium (50-200)	white, purple	N/A	Tabanaemontana stapfiana,Ochna holstii,Cupressus lusitanica,Polycias fulva	much (<75%)
RE-CH3-AGRI-128		CH3	AGRI	128	2021-09-05	Agricultural land		Humus rich (black)	little	100%	0	>50%	N/A	5	little (<50)	white	Maranta arundinacea , Brassica oleracea, Musa acuminata	Eucalyptus saligna, Grevillea robusta, Persea americana
RE-CH3-AGRI-16		CH3	AGRI	16	2021-09-05	Fallow Land		Humus rich (black)	no	>25%	0	>25%	no	10	little (<50)	white, pink, yellow	Brassica Oleracea	Eriobotrya japonica	no shadow
RE-CH3-AGRI-32		CH3	AGRI	32	2021-09-05	Agricultural land		Humus rich (black)	little	>75%	>25%	<25%	little	8	medium (50-200)	yellow, pink, white	Saccharum officinarum	Eriobotrya japonica, Persea americana, Musa acuminata	little (<25%)
RE-CH3-AGRI-64		CH3	AGRI	64	2021-09-05	Agricultural land		Humus rich (black)	little	>75%	<25%	<25%	no	18	medium (50-200)	white, pink	Ipomoea batatas, Curcubita maxima(Pumpkin), Brassica oleracea, Saccharum officinarum, tomato, lab lab	Grevillea robusta	no shadow
RE-CH3-AGRI-8		CH3	AGRI	8	2021-09-05	Fallow Land		Humus rich (black)	medium	>75%	0	>25%	no	15	N/A	yellow	N/A	Tabanaemontana stapfiana, Pinus patula, Melia volkensii,Cupressus lusitanica,Polycias fulva	little (<25%)
RE-CH3-E-0		CH3	E	0	2021-09-05	Forest Edge		Humus rich (black)	little	>25%	>50%	>50%	little	10	much (>200)	yellow	N/A	Tabanaemontana stapfiana, Ochna holstii	little (<25%)
RE-CH3-F-200		CH3	F	-200	2021-09-05	Forest		Humus rich (black)	much	N/A	>50%	100%	no	15	medium (50-200)	white	N/A	Tabanaemontana stapfiana, Ochna holstii	totally (>75%)
RE-CH3-F-8		CH3	F	-8	2021-09-05	Forest		Humus rich (black)	much	>25%	>50%	100%	medium	15	medium (50-200)	white, pink	N/A	Tabanaemontana stapfiana, Syzygium guineense	medium (<50%)
RE-CH4-AGRI-128		CH4	AGRI	128	2021-09-05	Agricultural land		Humus rich (black)	no	>75%	0	>50%	N/A	N/A	medium (50-200)	white, yellow	Spinacia oleracea, Solanum nigrum, Brassica oleracea var. capitata, sugarcane	Grevillea robusta, Musa acuminata, Pinus patula, Eriobotrya japonica	little (<25%)
RE-CH4-AGRI-16		CH4	AGRI	16	2021-09-05	Agricultural land		Humus rich (black)	little	>75%	<25%	<25%	no	25	much (>200)	yellow, pink, white	N/A	Pinus patula , Grevillea robusta	no shadow
RE-CH4-AGRI-32		CH4	AGRI	32	2021-09-05	Agricultural land		Humus rich (black)	no	>75%	0	<25%	no	25	much (>200)	white, pink, yellow	N/A	Psidium guajava	no shadow
RE-CH4-AGRI-64		CH4	AGRI	64	2021-09-05	Agricultural land		Humus rich (black)	N/A	100%	>50%	>50%	no	20	medium (50-200)	white, pink	Maranta arundinacea	Ochna holstii , Grevillea robusta	little (<25%)
RE-CH4-AGRI-8		CH4	AGRI	8	2021-09-05	Agricultural land		Humus rich (black)	medium	>50%	>25%	>75%	no	5	little (<50)	white	N/A	Tabanaemontana stapfiana, Ficus sycomorous	medium (<50%)
RE-CH4-E-0		CH4	E	0	2021-09-05	Forest Edge		Humus rich (black)	medium	>50%	>75%	100%	little	N/A	medium (50-200)	yellow	N/A	Tabanaemontana stapfiana, pinus patula, Syzygium guineense, Eucalyptus saligna	medium (<50%)
RE-CH4-F-200		CH4	F	-200	2021-09-05	Forest		Humus rich (black)	N/A	>75%	100%	100%	medium	25	much (>200)	white	N/A	Syzygium guineense, Tabanaemontana stapfiana	totally (>75%)
RE-CH4-F-8		CH4	F	-8	2021-09-05	Forest		Humus rich (black)	much	<25%	>75%	100%	little	20	little (<50)	white, pink	N/A	Pinus patula, Tabanaemonatana stapfiana, Syzygium guineense	totally (>75%)
RE-CH5-AGRI-128		CH5	AGRI	128	2021-09-07	Agricultural land		Humus rich (black)	little	<25%	0%	<25%	no	10	little (<50)	pink	N/A	Eucalyptus saligna,Casuarina equestifolia,Musa acuminata	no shadow
RE-CH5-AGRI-16		CH5	AGRI	16	2021-09-07	Agricultural land		Humus rich (black)	little	>50%	>25%	>75%	no	20	little (<50)	white	N/A	Grevillea robusta,	no shadow
RE-CH5-AGRI-32		CH5	AGRI	32	2021-09-07	Agricultural land		Humus rich (black)	medium	100%	<25%	0	no	15	much (>200)	white/pink/purple/yellow	Solanum nigrum, Brassica oleracea, grasses	Bidens pilosa	no shadow
RE-CH5-AGRI-64		CH5	AGRI	64	2021-09-07	Agricultural land		Humus rich (black)	little	<25%	>25%	<25%	little	20	little (<50)	white/purple	N/A	Eucalyptus saligna,Pinus patula,Grevillea robusta	no shadow
RE-CH5-AGRI-8		CH5	AGRI	8	2021-09-07	Agricultural land		Humus rich (black)	medium	<25%	>25%	>50%	little	30	medium (50-200)	yellow/white/purple	N/A	Grevillea robusta,Tabanaemontana stapfiana,Warburgia.	no shadow
RE-CH5-E-0		CH5	E	0	2021-09-07	Forest Edge		Humus rich (black)	medium	<25%	<25%	>50%	little	15	little (<50)	purple		Eucalyptus saligna,Casuarina equestifolia	little(<25%)
RE-CH5-F-200		CH5	F	-200	2021-09-07	Forest		Humus rich (black)	much	<25%	>75%	>75%	little	15	medium (50-200)	Purple/white	N/A	Tabanaemontana staphiana,Prunus africana	medium(<75%)
RE-CH5-F-8		CH5	F	-8	2021-09-07	Forest		Humus rich (black)		>75%	>75%	100%	medium	15	little (<50)	white	N/A	Casuarina equsitifolia,Tabanaemontana staphiana	medium (<75%)
RE-CH6-E-0		CH6	E	0	2021-09-07	Forest Edge		Humus rich (black)	medium	>75%	>25%	<25%	no	10	medium (50-200)	purple/pink	N/A	Pinus,Tabanaemontana staphiana	little(<25%)
RE-CH6-F-8		CH6	F	-8	2021-09-07	Forest		Humus rich (black)	much	>25%	>75%	100%	little	15	medium (50-200)	white	N/A	Tectonia,Tabanaemonta staphiana	medium(<75%)
RE-CH6-AGR-8		CH6	AGRI	8	2021-09-07	Agricultural land		Humus rich (black)	no	<25%	<25%	0%	no	12	medium (50-200)	white	Solanum nigrum	N/A	no shadow
RE-CH6-AGR-16		CH6	AGRI	16	2021-09-07	Agricultural land		Humus rich (black)	no	>50%	<25%	>50%	no	18	medium (50-200)	yellow	Brassica oleracea,Spinacia oleracea ,Maranta arundinacea	Grevillea robusta,Casuarina equisitifolia	no shadow
RE-CH6-AGR-32		CH6	AGRI	32	2021-09-07	Fallow Land		Humus rich (black)	little	>75%	>75%	0%	no	20	medium (50-200)	purple/yellow/red/pink	N/A	N/A	no shadow
RE-CH6-AGR-64		CH6	AGRI	64	2021-09-07	Agricultural land		Humus rich (black)	little	>75%	>25%<25%		no	15	much (>200)	white/yellow/pink	N/A	Eucalyptus saligna,Pinus pinata	no shadow
RE-CH6-AGR-128		CH6	AGRI	128	2021-09-07	Agricultural land		Humus rich (black)	no	>75%	<25%	<25%	little	20	medium (50-200)		Saccharum officinarum,Maranta arundinacea	Persea americana,Musa acuminata	no shadow
RE-CH6-F-200		CH6	F	-200	2021-09-07	Forest		Humus rich (black)	much	<25%	>75%	100%	little	10	medium (50-200)	pink/white/purple		Lantana camara,Tabanaemontana stapfiana,Solanum	much (<75%)
RE-CH7-E-0		CH7	E	0	2021-09-08	Forest Edge		Humus rich (black)	medium	>50%	>50%	>50%	no	15	little (<50)	purple	n/a	Eucalyptus saligna,Albizia gummifera	medium(<75%)
RE-CH7-AGR-8		CH7	AGRI	8	2021-09-08	Fallow Land		Humus rich (black)	little	>75%	0%	>25%	no	10	little (<50)	white	N/A	Cupressus lucitanica,Prunus africana	much (<75%)
RE-CH7-AGR-16		CH7	AGRI	16	2021-09-08	Agricultural land		Humus rich (black)	medium	>75%	>75%	>25%	little	25	much (>200)	pink/white/yellow	N/A		little(<25%)
RE-CH7-AGR-32		CH7	AGRI	32	2021-09-08	Agricultural land		Humus rich (black)	little	>75%	>50%	<25%	medium	15	much (>200)	white/blue/pink	N/A	Tabanaemontana staphiana,Ficus sycomorous	little(<25%)
RE-CH7-AGR-64		CH7	AGRI	64	2021-09-08	Agricultural land		Humus rich (black)	medium	>75%	100%	<25%	medium	25	much (>200)	pink/white	N/A	Persea americana,Eriobotrya japonica	no shadow
RE-CH7-AGR-128		CH7	AGRI	128	2021-09-08	Agricultural land		Humus rich (black)	medium	>75%	>75%	<25%	medium	15	medium (50-200)	white/pink	N/A	Persea americana	little (<25%)
RE-CH7-F-8		CH7	F	-8	2021-09-08	Forest		Humus rich (black)	much	>50%	>75%	100%	medium	10	little (<50)	purple	N/A	Tabanaemontana stapfiana,Prunus,Eucalyptus saligna	much (<75%)
RE-CH7-F-200		CH7	F	-200	2021-09-08	Forest		Humus rich (black)	much	>50%	>75%	>75%	medium	15	little (<50)	white	N/A	Tabanaemontana stapfiana	much (<75%)
RE-CH8-E-0		CH8	E	0	2021-09-08	Forest Edge		Humus rich (black)	much	>50%	>75%	>75%	no	20	little (<50)	white	N/A	Tabanaemontana Stapfiana,Pinus patula	medium(<75%)
RE-CH8-AGR-8		CH8	AGRI	8	2021-09-08	Agricultural land		Humus rich (black)	much	100%	>75%	<25%	little	15	much (>200)	Purple/white	N/A	Tabanaemontana Stapfiana,Solanum muricatum	little(<25%)
RE-CH8-AGR-16		CH8	AGRI	16	2021-09-08	Fallow Land		Humus rich (black)	much	100%	>75%	<25%	little	15	medium (50-200)	pink/purple	Brassica oleracea,Solanum nigrum	Eriobotrya japonica,Tabanaemontana stapfiana	little(<25%)
RE-CH8-AGR-32		CH8	AGRI	32	2021-09-08	Agricultural land		Humus rich (black)	much	100%	>75%	<25%	little	30	much (>200)	pink/purple	N/A	Persea americana,Grevillea robusta ,Pinus patula,Eucalyptus saligna	little(<25%)
RE-CH8-AGR-64		CH8	AGRI	64	2021-09-08	Agricultural land		Humus rich (black)	much	100%	>50%	0%	no	15	medium (50-200)	yellow/pink	N/A	Pinus patula,Tamarindus indica	no shadow
RE-CH8-AGR-128		CH8	AGRI	128	2021-09-08	Agricultural land		Humus rich (black)	medium	>75%	>75%	<25%	no	20	much (>200)	yellow/pink/white	Brassica oleracea,Abelmoschus esculentus	Pinus patula,Eucalyptus Saligna	little(<25%)
RE-CH8-F-8		CH8	F	-8	2021-09-08	Forest		Humus rich (black)	much	>25%	>75%	100%	no	10	little (<50)	white	N/A	Tabanaemontana Stapfiana,Pinus patula	much (<75%)
RE-CH8-F-200		CH8	F	-200	2021-09-08	Forest		Humus rich (black)	much	<25%	>50%	100%	medium	8	little (<50)	white	N/A	Tabanaemontana Stapfiana,Pinus patula,Ficus sycomorous	much (<75%)
RE-CH9-E-0		CH9	E	0	2021-09-09	Forest Edge		Humus rich (black)	little	>75%	<25%	<25%	little	15	medium (50-200)	yellow/pink/white	N/A	Cupressus lusitanica,Polycias fulva,Tabanaemontana stapfiana	little(<25%)
RE-CH9-F-8		CH9	F	-8	2021-09-09	Forest		Humus rich (black)	little	100%	>50%	>50%	no	20	medium (50-200)	yellow/purple	N/A	Cupressus lusitanica,Tabanaemontana stapfiana	little(<25%)
RE-CH9-AGR-8		CH9	AGRI	8	2021-09-09	Agricultural land		Humus rich (black)	little	<25%	>50%	>75%	no	15	medium (50-200)	yellow/purple/white	N/A	Tabanaemontana stapfiana,Cupressus lusitanica,Polyscias,Vagueria volkensii,Rubus etc	medium(<75%)
RE-CH9-AGR-16		CH9	AGRI	16	2021-09-09	Agricultural land		Humus rich (black)	medium	>25%	>50%	>75%	no	12	medium (50-200)	purple/yellow	N/A	Tabanaemontana stapfiana,Xymalos monospora,Eucalyptus saligna,Rubus	medium(<75%)
RE-CH9-AGR-32		CH9	AGRI	32	2021-09-09	Fallow Land		Humus rich (black)	much	<25%	<25%	>25%	no	10	no	N/A	N/A	strombosia scheffleri,Cupressus lusitanica,Tabanaemontana stapfiana,Ficus thoningii,Albizia gummifera	no shadow
RE-CH9-AGR-64		CH9	AGRI	64	2021-09-09	Agricultural land		Humus rich (black)	medium	>75%	<25%	<25%	no	12	little (<50)	white/purple	zea mays	Macaranga conglomerata,Maesa lanceolata,Ficus sycomorous	little(<25%)
RE-CH9-AGR-128		CH9	AGRI	128	2021-09-09	Agricultural land		Humus rich (black)	little	>50%	>75%	<25%	no	15	little (<50)	white	Musa acuminata,Persea americana,Maranta arundinacea	Xymalos monospora, Ficus sycomorous, Lysygium guinesis	little(<25%)
RE-CH9-F-200		CH9	F	-200	2021-09-09	Forest		Humus rich (black)	little	100%	100%	100%	much	15	much (>200)	purple	N/A	Tabanaemontana stapfiana,Xymalos monospora,Leocapus fragilis,Cuppressus lusitanica	much (<75%)
RE-CH10-E-0		CH10	E	0	2021-09-09	Forest Edge		Humus rich (black)	medium	>50%	>50%	>50%	little	8	little (<50)	white	N/A	Tabanaemontana stapfiana,Macaranga conglomerata,Fern	medium(<75%)
RE-CH10-F-8		CH10	F	-8	2021-09-09	Forest		Humus rich (black)	much	>75%	>75%	100%	medium	15	little (<50)	white	N/A	Cupressus lusitanica,Xymalos monospora,Fern	much (<75%)
RE-CH10-F-200		CH10	F	-200	2021-09-09	Forest		Humus rich (black)	much	>75%	>75%	100%	much	15	medium (50-200)	white/yellow/pink/purple	N/A	Leocarpus fragilis,Ficus sycomorous,Tabanaemontana stapfiana,Macaranga conglomerata,Eucalyptus saligna,Dracina afromontana	much (<75%)
RE-CH10-AGR-8		CH10	AGRI	8	2021-09-09	Agricultural land		Humus rich (black)	no	>50%	<25%	<25%	no	20	no	N/A	N/A	Eucalyptus saligna,Albizia buchananii,Xymalos monospora etc	no shadow
RE-CH10-AGR16		CH10	AGRI	16	2021-09-09	Agricultural land		Humus rich (black)	little	>75%	>75%	<25%	little	20	medium (50-200)	white	N/A	Xymalos monospora, Macaranga conglomerata,Pleiocarpa pycantha	no shadow
RE-CH10-AGR-32		CH10	AGRI	32	2021-09-09	Agricultural land		Humus rich (black)	medium	100%	>25%	<25%	little	15	little (<50)	white	Musa acuminata,Persea americana,Maranta arundinacea,Solanum lycopersicum,Brassica oleracea.	Cupressus lusitanica,Maesa lanceolata	no shadow
RE-CH10-AGR-64		CH10	AGRI	64	2021-09-09	Agricultural land		Humus rich (black)	no	>75%	>75%	<25%	no	15	medium (50-200)	purple/white/yellow	Brassica oleracea,Zea mays,Maranta arundinacea,Fern	Grevillea robusta,Albizia gummifera,Eucalyptus saligna,Macadamia integrifolia,Musa acuminata	little(<25%)
RE-CH10-AGR-128		CH10	AGRI	128	2021-09-09	Agricultural land		Humus rich (black)	little	>75%	100%	<25%	little	20	medium (50-200)	yellow	N/A	Xymalos monospora,Rytigynia uhligii,Lantana camara,Psidium guajava.	little(<25%)
RE-CH11-E-0		CH11	E	0	2021-09-10	Forest Edge		Humus rich (black)	medium	>50%	>75%	>50%	little	10	medium (50-200)	yellow	N/A	Rubus volkensii,Syzygium guineense	medium(<75%)
RE-CH11-F-8		CH11	F	-8	2021-09-10	Forest		Humus rich (black)	much	>75%	>75%	100%	medium	10	little (<50)	white/purple	N/A	Tabanaemontana stapfiana,Syzygium,Cuppressus lusitanica	much (<75%)
RE-CH11-AGR-8		CH11	AGRI	8	2021-09-10	Agricultural land		Humus rich (black)	little	>50%	<25%	<25%	no	15	medium (50-200)	yellow/white	Solanum lycopersicum,Persea americana	Cupressus lusitanica,Persea americana(Dominating)	little(<25%)
RE-CH11-AGR-16		CH11	AGRI	16	2021-09-10	Agricultural land		Humus rich (black)	no	<25%	0%	0%	no	15	medium (50-200)	purple/white	Brassica oleracea	N/A	no shadow
RE-CH11-AGR-32		CH11	AGRI	32	2021-09-10	Agricultural land		Humus rich (black)	little	<25%	<25%	<25%	no	10	little (<50)	white	Solanum nigrum,Musa acuminata,Maranta arundinacea	Ficus sycomorous	no shadow
RE-CH11-AGR-64		CH11	AGRI	64	2021-09-10	Agricultural land		Humus rich (black)	no	<25%	<25%	0%	no	20	little (<50)	purple	N/A	N/A	no shadow
RE-CH11-AGR-128		CH11	AGRI	128	2021-09-10	Agricultural land		Humus rich (black)	no	100%	>50%	<25%	no	20	medium (50-200)	Yellow/purple	Eriobotrya japonica	Grevillea robusta,Eucalyptus saligna,Macaranga capensis	no shadow
RE-CH11-AGR-200		CH11	AGRI	-200	2021-09-10	Forest		Humus rich (black)	much	<25%	>75%	<100%	medium	10	little (<50)	white	N/A	Syzygium guineense,Vitex keniensis	much (<75%)
RE-CH12-E-0		CH12	E	0	2021-09-10	Forest Edge		Humus rich (black)	little	<25%	<25%	>25%	medium	15	little (<50)	pink	N/A	Tabanaemontana stapfiana(Dominating),Syzygium,Cuppressus lusitanica	little(<25%)
RE-CH12-F-8		CH12	F	-8	2021-09-10	Forest		Humus rich (black)	medium	>50%	>75%	>75%	medium	15	little (<50)	white	N/A	Cupressus lusitanica,Tabanaemontana stapfiana,Syzygium guineense	much (<75%)
RE-CH12-AGR-8		CH12	AGRI	8	2021-09-10	Agricultural land		Humus rich (black)	no	<25%	<25%	<25%	no	5	little (<50)	white	N/A	Tabanaemontana stapfiana,Syzygium guineense	no shadow
RE-CH12-AGR-16		CH12	AGRI	16	2021-09-10	Agricultural land		Humus rich (black)	much	>50%	>50%	<25%	little	12	little (<50)	pink	Musa acuminata	Tabanaemontana stapfiana,Ficus sycomorous,Grevillea robusta	no shadow
RE-CH12-AGR-32		CH12	AGRI	32	2021-09-10	Agricultural land		Humus rich (black)	little	<25%	<25%	0%	no	10	no blossoms	N/A	Brassica oleracea,Curcubita maxima,Solanum nigrum	N/A	no shadow
RE-CH12-AGR-64		CH12	AGRI	64	2021-09-10	Agricultural land		Humus rich (black)	little	>75%	>75%	<25%	no	15	medium (50-200)	purple/pink/yellow	Musa acuminata,Maranta arundinacea	Grevillea Robusta(Dominating)	no shadow
RE-CH12-AGR-128		CH12	AGRI	128	2021-09-10	Agricultural land		Humus rich (black)	medium	>75%	>75%	<25%	medium	15	medium (50-200)	white/yellow	N/A	Citrus Limon	no shadow
RE-CH12-F-200		CH12	F	-200	2021-09-10	Agricultural land		Humus rich (black)	much	>25%	>75%	100%	medium	8	little (<50)	white	N/A	Tabanaemontana stapfiana,syzygium guineense,Phoenix reclinata	much (<75%)
RE-CH13-E-0		CH13	E	0	2021-09-12	Forest Edge		Humus rich (black)	medium	>50%	>50%	>50%	little	15	medium (50-200)	white/pink	N/A	Macaranga conglomerata,Grevillea robusta,Ficus sycomorous	little(<25%)
RE-CH13-F-8		CH13	F	-8	2021-09-12	Forest		Humus rich (black)	medium	>75%	>75%	100%	much	20	no blossoms	N/A	N/A	Tabanaemontana stapfiana,syzygium guineense	medium(<75%)
RE-CH13-AGR-8		CH13	AGRI	8	2021-09-12	Agricultural land		Humus rich (black)	little	>75%	<25%	<25%	no	10	medium (50-200)	purple/white	N/A	Grevillea robusta,Musa acuminata,Macaranga capensis,Persea americana	no shadow
RE-CH13-AGR-16		CH13	AGRI	16	2021-09-12	Agricultural land		Humus rich (black)	little	>50%	<25%	<25%	little	20	medium (50-200)	white/purple	Brassica oleracea	Grevillea robusta,Rubus volkensii	no shadow
RE-CH13-AGR-32		CH13	AGRI	32	2021-09-12	Agricultural land		Humus rich (black)	no	>25%	>50%	>50%	little	15	medium (50-200)	purple/white	N/A	Macaranga capensis,Grevillea robusta	no shadow
RE-CH13-AGR-64		CH13	AGRI	64	2021-09-12	Agricultural land		Humus rich (black)	little	<25%	<25%	<25%	little	5	little (<50)	white/yellow	Brassica Oleracea	Eriobotrya japonica,Musa acuminata,Saccharum officinarum,Grevillea robusta,Palm	no shadow
RE-CH13-AGR-128		CH13	AGRI	128	2021-09-12	Agricultural land		Humus rich (black)	little	>75%	<25%	>50%	medium	15	little (<50)	white	N/A	Eriobotrya japonica,Psidium guajava,Persea americana	little(<25%)
RE-CH13-F-200		CH13	F	-200	2021-09-12	Forest		Humus rich (black)		>25%	>75%	100%	medium	10	little (<50)	white	N/A	Syzygium guineense,Cupressus lusitanica,pleiocarpa pycantha,Xymalos monospora,Tabanaemontana stapfiana,Vitex keniensis	much (<75%)
RE-CH14-E-0		CH14	E	0	2021-09-12	Forest Edge		Humus rich (black)	little	<25%	>50%	>50%	no	8	little (<50)	yellow/pink	N/A	Grevillea robusta,cupressus lusitanica,Persea americana,Rubus	little(<25%)
RE-CH14-F-8		CH14	F	-8	2021-09-12	Forest		Humus rich (black)	little	<25%	>50%	>75%	little	5	no blossoms	N/A	N/A	cupressus lusitanica,syzygium guineense	much (<75%)
RE-CH14-AGR-8		CH14	AGRI	8	2021-09-12	Fallow Land		Humus rich (black)		<25%	>75%	<25%	little	5	little (<50)	white	N/A	Psidium guajava,Cupressus lusitanica,Grewia asiatica,syzygium guineense
RE-CH14-AGR-16		CH14	AGRI	16	2021-09-12	Fallow Land		Humus rich (black)	little	100%	100%	>50%	medium	28	much (>200)	Yellow/white	N/A	Senna ciamea,Grevillea robusta,Psidium guajava	medium(<75%)
RE-CH14-AGR-32		CH14	AGRI	32	2021-09-12	Agricultural land		Humus rich (black)	no	>50%	<25%	<25%	no	25	little (<50)	white/purple	Brassica oleracea	Persea americana,Grevillea robusta ,Musa acuminata	no shadow
RE-CH14-AGR-64		CH14	AGRI	64	2021-09-12	Agricultural land		Humus rich (black)	no	>50%	<25%	<25%	no	15	medium (50-200)	pink/white	N/A	Rubus volkensii,Eucalyptus saligna,Eriobotrya japonica,Musa acuminata,Palm tree	no shadow
RE-CH14-AGR-128		CH14	AGRI	128	2021-09-12	Fallow Land		Humus rich (black)	medium	>75%	100%	<25%	no	20	much (>200)	yellow/purple	N/A	Cupressus lusitanica,Eucalyptus saligna,Phoenix reclinata	little(<25%)
RE-CH14-F-200		CH14	F	-200	2021-09-12	Forest		Humus rich (black)	much	<25%	>75%	100%	little	15	little (<50)	white	N/A	Tabanaemontana stapfiana,Syzygium guineense	much (<75%)
RE-CH15-E-0		CH15	E	0	2021-09-14	Forest Edge		Humus rich (black)	much	<25%	>25%	>25%	little	20	little (<50)	purple	N/A	Eucalyptus saligna(Dominant),Prunus africana,Tabanaemontana stapfiana	little(<25%)
RE-CH15-F-8		CH15	F	-8	2021-09-14	Forest		Humus rich (black)	much	<25%	>50%	>50%	little	8	no	N/A	N/A	Eucalyptus saligna,Prunus africana	much (<75%)
RE-CH15-AGR-8		CH15	AGRI	8	2021-09-14	Agricultural land		Humus rich (black)	little	<25%	<25%	<25%	no	15	little (<50)	yellow	N/A	Cupressus lusitanica,Croton megalocarpus	no shadow
RE-CH15-AGR-16		CH15	AGRI	16	2021-09-14	Agricultural land		Humus rich (black)	little	>25%	<25%	<25%	no	25	little (<50)	Red/white	Brassica oleracea,Amaranthus hybridus	Macadamia intergrifolia,Citrus limon	no shadow
RE-CH15-AGR-32		CH15	AGRI	32	2021-09-14	Fallow Land		Humus rich (black)	no	<25%	<25%	0%	no	10	no blossoms	N/A	N/A	N/A	no shadow
RE-CH15-AGR-64		CH15	AGRI	64	2021-09-14	Fallow Land		Humus rich (black)	little	>50%	>50%	0%	no	20	little (<50)	white	N/A	N/A	no shadow
RE-CH15-AGR-128		CH15	AGRI	128	2021-09-14	Agricultural land		Humus rich (black)		<25%	>25%	<25%	no	10	medium (50-200)	purple/white	N/A	Senna ciamea,Tamarindus indica,Grewia	no shadow
RE-CH15-F-200		CH15	F	-200	2021-09-14	Forest		Humus rich (black)	much	<25%	>50%	>50%	medium	15	little (<50)	white	N/A	Tabanaemontana stapfiana,Syzygium guineense,Croton megalocarpus,Vitex keniensis	medium(<75%)
RE-FU-PLA-1		FU1	PLA	1	17/9/2021	Plantation		Humus rich (black)	much	>25%	<25%	>75%	medium	20	medium (50-200)	Purple	N/A	Eucalyptus saligna,Phoenix reclinata,Casuarina equisetifolia,Sorindeia madagascariensis	much (<75%)
RE-FU-PLA-2		FU2	PLA	2	17/9/2021	Plantation		Humus rich (black)	much	<25%	>25%	>50%	much	15	little (<50)	Purple	N/A	Dominated by Eucalyptus Saligna,Leucaena leucacephala and Phoenix Reclinata	medium(<75%)
RE-FU-PLA-3		FU3	PLA	3	17/9/2021	Plantation		Humus rich (black)	much	<25%	<25%	<25%	much	10	little (<50)	Purple/Pink	N/A	Eucalyptus saligna,Phoenix reclinata	little(<25%)
RE-FU-PLA-4		FU4	PLA	4	17/9/2021	Plantation		Humus rich (black)	medium	<25%	>25%	>50%	much	5	little (<50)	Purple	N/A	Casuarina equisetifolia,Eucalyptus saligna(Both are dominant species)	medium(<75%)
RE-FU-PLA-5		FU5	PLA	5	17/9/2021	Plantation		Humus rich (black)	much	0%	>25%	>75%	much	0	no blossoms	N/A	N/A	Eucalyptus saligna(dominant)	medium(<75%)
RE-FU-PLA-6		FU6	PLA	6	17/9/2021	Plantation		Humus rich (black)	much	<25%	>50%	>75%	much	20	little (<50)	White/red	N/A	Casuarina equisetifolia,Eucalyptus saligna(Both are dominant species)	medium(<75%)
RE-FU-PLA-7		FU7	PLA	7	17/9/2021	Plantation		Humus rich (black)	much	>50%	>25%	>75%	much	8	little (<50)	Purple/Pink	N/A	Eucalyptus Saligna(dominant species)	medium(<75%)
RE-FU-PLA-8		FU8	PLA	8	17/9/2021	Plantation		Humus rich (black)	medium	<25%	>50%	>75%	much	18	little (<50)	White	N/A	Newtonia buchananii,Eucalyptus saligna,Casuarina equisetifolia	medium(<75%)
RE-FU-PLA-9		FU9	PLA	9	17/9/2021	Plantation		Humus rich (black)	much	<25%	>75%	>75%	no	10	no	N/A	N/A	Newtonia buchananii,Eucalyptus saligna.	medium(<75%)
RE-FU-PLA-10		FU10	PLA	10	17/9/2021	Plantation		Humus rich (black)	much	<25%	<25%	>50%	little	15	little (<50)	Pink	N/A	Eucalyptus saligna	little(<25%)
RE-FU-PLA-11		FU11	PLA	11	18/9/2021	Plantation		Humus rich (black)	medium	>50%	>75%	>75%	medium	15	medium (50-200)	white/purple	N/A	Ochna holstii , Eucalyptus saligna,Newtonia buchananii	little(<25%)
RE-FU-PLA-12		FU12	PLA	12	18/9/2021	Plantation		Humus rich (black)	much	>50%	>75%	>50%	much	10	little (<50)	Purple	N/A	Eucalyptus saligna,Newtonia buchananii	medium(<75%)
RE-FU-PLA-13		FU13	PLA	13	18/9/2021	Plantation		Humus rich (black)	much	<25%	>25%	>50%	much	10	little (<50)	White	N/A	Eucalyptus saligna(dominant species)	no shadow
RE-FU-PLA-14		FU14	PLA	14	18/9/2021	Plantation		Humus rich (black)	little	<25%	>50%	<25%	no	10	little (<50)	Purple	N/A	Eucalyptus saligna(dominant species)	no shadow
RE-FU-PLA-15		FU15	PLA	15	18/9/2021	Plantation		Humus rich (black)	little	<25%	<25%	<25%	little	10	little (<50)	White	N/A	Eucalyptus saligna(dominant species)	no shadow
RE-FU-PLA-16		FU16	PLA	16	18/9/2021	Plantation		Humus rich (black)	medium	<25%	>25%	>50%	little	30	no blossoms	N/A	N/A	Eucalyptus saligna(dominant species)	little(<25%)
RE-FU-PLA-17		FU17	PLA	17	18/9/2021	Plantation		Humus rich (black)	much	>25%	>50%	>75%	medium	20	no blossoms	N/A	N/A	Eucalyptus saligna(dominant species)	little(<25%)
RE-FU-PLA-18		FU18	PLA	18	18/9/2021	Plantation		Humus rich (black)	medium	<25%	>75%	>50%	little	25	little (<50)	Yellow	N/A	Eucalyptus saligna(dominant species)	little(<25%)
RE-FU-PLA-19		FU19	PLA	19	18/9/2021	Plantation		Humus rich (black)	little	<25%	>25%	>75%	little	10	no blossoms	N/A	N/A	Eucalyptus saligna(dominant species)	little(<25%)
RE-FU-PLA-20		FU20	PLA	20	18/9/2021	Plantation		Humus rich (black)	much	<25%	<25%	>50%	medium	10	no blossoms	N/A	N/A	Eucalyptus saligna(dominant species)	little(<25%)
RE_CH16_E_0		CH16	E	0	21/9/2021	Forest Edge		Humus rich (black)	no	>50%	<25%	>50%	little	20	medium (50-200)	white	N/A	Tabanaemontana stapfiana,Syzygium guineense,Ficus sp,Phoenix reclinata and Cussonia spicata	medium(<75%)
RE_CH16_F_8		CH16	F	-8	21/9/2021	Forest		Humus rich (black)	medium	>25%	>50%	>75%	little	10	little (<50)	white	N/A	Tabanaemontana stapfiana,Syzygium guineense,Ficus sp,Phoenix reclinata and Cussonia spicata	medium(<75%)
RE_CH16_AGR_8		CH16	AGRI	8	21/9/2021	Agricultural land		Humus rich (black)	no	<25%	<25%	<25%	little	15	little (<50)	white	Passiflora edulis(climber)	Ficus sycomorous	no shadow
RE_CH16_AGR_16		CH16	AGRI	16	21/9/2021	Agricultural land		Humus rich (black)	little	>25%	<25%	<25%	no	18	much (>200)	Yellow	Passiflora edulis(climber)	Grevillea robusta,Tamarindus indica	no shadow
RE_CH16_AGR_32		CH16	AGRI	32	21/9/2021	Agricultural land		Humus rich (black)	little	>50%	<25%	<25%	no	12	medium (50-200)	Yellow/white/Purple	passiflora edulis(climber),Saccharum officinarum	Psidium guajava,Tamarindus indica	no shadow
RE_CH16_AGR_64		CH16	AGRI	64	21/9/2021	Agricultural land		Humus rich (black)	little	>25%	0%	<25%	no	15	much (>200)	white/yellow	Brassicaoleracea,Passiflora edulis	Ficus sycomorous,Manihot esculanta	no shadow
RE_CH16_AGR_128		CH16	AGRI	128	21/9/2021	Agricultural land		Humus rich (black)	no	<25%	<25%	<25%	no	12	medium (50-200)	Red/white/pink	Passiflora edulis	Persea americana,Macadamia intergrifolia,Tamarindus indica	no shadow
RE_CH16_F_200		CH16	F	-200	21/9/2021	Forest		Humus rich (black)	much	<25%	>50%	>75%	medium	10	medium (50-200)	white	N/A	Tabanaemontana stapfiana,Newtonia buchananii,Syzygium guineense,Ochna holstii .	medium(<75%)
RE_CH17_E_0		CH17	E	0	21/9/2021	Forest Edge		Humus rich (black)	little	>50%	>25%	>25%	no	20	medium (50-200)	Red/Yellow/Pink	N/A	Lantana camara,Ficus sycomorous,Grewia,Syzygium guineense	medium(<75%)
RE_CH17_AGR_8		CH17	F	-8	21/9/2021	Forest		Humus rich (black)	little	>25%	<25%	<25%	no	15	little (<50)	White	Brassica oleracea,Musa acuminata(Banana),Psidium guajava	Tabanaemontana stapfiana,Croton megalocarpus,Ochna holstii	little(<25%)
RE_CH17_AGR_16		CH17	AGRI	8	21/9/2021	Agricultural land		Humus rich (black)	no	<25%	<25%	<25%	no	15	little (<50)	White/Pink	Brassica oleraceae,Musa acuminata,Solanum nigrum,Ipomoea batata	Macadamia intergrifolia,Psidium guajava,Ficus sycomorous,Albizia gummifera,Tabanaemontana stapfiana	no shadow
RE_CH17_AGR_32		CH17	AGRI	16	21/9/2021	Fallow Land		Humus rich (black)	little	>75%	>75%	<25%	no	25	much (>200)	Pink/Yellow/White/Purple	N/A	Macadamia intergrifolia,Albizia gummifera	no shadow
RE_CH17_AGR_64		CH17	AGRI	32	21/9/2021	Agricultural land		Humus rich (black)	no	>50%	>50%	<25%	no	18	medium (50-200)	Yellow/white/Red	Pisum sativum	Grevillea robusta,Phoenix reclinata,Senna spectabilis,Fern	no shadow
RE_CH17_AGR_128		CH17	AGRI	64	21/9/2021	Agricultural land		Humus rich (black)	no	>50%	>50%	<25%	no	20	medium (50-200)	White/Pink/Yellow	N/A	Annona cherimoya,Ficus sycomorous,Musa acuminata	no shadow
RE_CH17_F_200		CH17	AGRI	128	21/9/2021	Agricultural land		Humus rich (black)	much	<25%	>75%	>75%	no	5	medium (50-200)	White	N/A	Tabanaemontana stapfiana,Syzygium guineense,Eucalyptus saligna	medium(<75%)
RE_CH17_F_8		CH17	F	-200	21/9/2021	Forest		Humus rich (black)	much	>50%	>25%	>50%	no	18	medium (50-200)	White/Yellow	N/A	Tabanaemontana stapfiana,Syzygium guineense,Cussonia spicata	medium(<75%)
RE_CH18_E_0		CH18	E	0	22/9/2021	Forest Edge		Humus rich (black)	medium	>50%	>50%	>75%	no	15	little (<50)	white/blue/pink	N/A	Tabanaemontana stapfiana,Syzygium guineense,Newtonia buchananii,Ochna holstii,Lantana camara,Prunus africana	medium(<75%)
RE_CH18_F_8		CH18	F		22/9/2021	Forest		Humus rich (black)	medium	<25%	>50%	>75%	little	10	little (<50)	White	N/A	Syzygium guineense,Sorindeia madagascariensis,Grewia sp,Phoenix reclinata	medium(<75%)
RE_CH18_AGR_8		CH18	AGRI		22/9/2021	Agricultural land		Humus rich (black)	little	>50%	<25%	<25%	no	28	medium (50-200)	White/red/Yellow	N/A	Macadamia integrifolia,Prunus africana,Tabanaemontana stapfiana.	no shadow
RE_CH18_AGR_16		CH18	AGRI		22/9/2021	Agricultural land		Humus rich (black)	no	>75%	>50%	<25%	no	20	little (<50)	Red	Saccharum officinarum	Macadamia integrifolia	no shadow
RE_CH18_AGR_32		CH18	AGRI		22/9/2021	Agricultural land		Humus rich (black)	no	>75%	<25%	<25%	no	18	medium (50-200)	Yellow/Purple/White/Red	Saccharum officinarum,Passiflora edulis	Macadamia integrifolia	no shadow
RE_CH18_AGR_64		CH18	AGRI		22/9/2021	Agricultural land		Humus rich (black)	no	>25%	>25%	0%	no	25	little (<50)	Yellow	Saccharum officinarum	Musa acuminata	no shadow
RE_CH18_AGR_128		CH18	AGRI		22/9/2021	Agricultural land		Humus rich (black)	little	>50%	>50%	<25%	little	15	medium (50-200)	Pink/Red	Maranta arundinacea(Arrow root),Ipomoea batata(sweet potatoes)	Ficus sycomorous,Eriobotrya japonica,Musa acuminata	no shadow
RE_CH18_F_200		CH18	F		22/9/2021	Forest		Humus rich (black)	no	>50%	<25%	<25%	no	15	medium (50-200)	white/purple	N/A	Ficus sycomorous,Senna spectabilis,Syzygium cumini	much (<75%)
RE_CH19_E_0		CH19	E		22/9/2021	Forest Edge		Humus rich (black)	no	>75%	>75%	75%	little	28	medium (50-200)	pink	N/A	Sterculia,Grewia villosa,Melia volkensii,Hoslundia opposita,Syzygium guineense	little(<25%)
RE_CH19_F_8		CH19	F		22/9/2021	Forest		Humus rich (black)	medium	>25%	>75%	>75%	medium	10	medium (50-200)	white/purple	N/A	Syzygium guineense,Tabanaemontana stapfiana,Grewia villosa,Sterculia sp.,Newtonii buchananii	medium(<75%)
RE_CH19_AGR_8		CH19	AGRI		22/9/2021	Agricultural land		Humus rich (black)	no	>50%	>25%	>25%	medium	30	medium (50-200)	White/Red	Passiflora edulis(passion plant)	Croton megalocarpus,Grevillea robusta,Macadamia integrifolia,Prunus africana	no shadow
RE_CH19_AGR_16		CH19	AGRI		22/9/2021	Agricultural land		Humus rich (black)	no	<25%	<25%	<25%	no	8	little (<50)	White	Saccharum officinarum,Passiflora edulis,Curcubita maxima,Musa acuminata	Terminalia indica,Prunus africana	no shadow
RE_CH19_AGR_32		CH19	AGRI		22/9/2021	Agricultural land		Humus rich (black)	no	>75%	>25%	>50%	no	15	medium (50-200)	Red/white/Purple	Saccharum officinarum,Passiflora edulis,Curcubita maxima,Musa acuminata	Macadamia integrifolia,Sterculia sp.,Hibiscus rosasinensis,Coffee arabica	no shadow
RE_CH19_AGR_64		CH19	AGRI		22/9/2021	Agricultural land		Humus rich (black)	no	>25%	>25%	0%	no	20	little (<50)	White	Brassica oleracea(Sukuma wiki)	N/A	no shadow
RE_CH19_AGR_128		CH19	AGRI		22/9/2021	Agricultural land		Humus rich (black)	no	>50%	<25%	<25%	no	15	medium (50-200)	white/purple	N/A	Ficus sycomorous,Senna spectabilis,Syzygium cumini	no shadow
RE_CH19_F_200		CH19	F		22/9/2021	Forest		Humus rich (black)	much	>25%	>75%	>75%	medium	10	little (<50)	White/Purple	N/A	Tabanaemontana stapfiana,Syzygium guineense,Eucalyptus saligna,Grevillea robusta	much (<75%)
RE_CH20_E-0		CH20	E		24/9/2021	Forest Edge		Humus rich (black)	little	<25%	>75%	0%	no	10	much (>200)	white/purple	N/A	N/A	medium(<75%)
RE_CH20_F_8		CH20	F		24/9/2021	Forest		Humus rich (black)	medium	>50%	100%	<25%	no	25	much (>200)	white	N/A	Sterculia sp.	little(<25%)
RE_CH20_AGR_8		CH20	AGRI		42/9/2021	Agricultural land		Humus rich (black)	no	<25%	<25%	0	no	25	little (<50)	Purple	N/A	N/A	no shadow
RE_CH20_AGR_16		CH20	AGRI		24/9/2021	Agricultural land		Humus rich (black)	no	<25%	<25%	<25%	little	15	little (<50)	white	N/A	N/A	no shadow
RE_CH20_AGR_32		CH20	AGRI		24/9/2021	Agricultural land		Humus rich (black)	no	<25%	0%	<25%	medium	5	little (<50)	white	N/A	Mangifera indica,Prunus africa,Newtonia buchananii,Melissa officinalis	no shadow
RE_CH20_AGR_64		CH20	AGRI		24/9/2021	Agricultural land		Humus rich (black)	no	>50%	>25%	0%	little	18	much (>200)	White/yellow/purple/Pink/Red	Solanum lycopersicum(Tomato)	N/A	no shadow
RE_CH20_AGR_128		CH20	AGRI		24/9/2021	Agricultural land		Humus rich (black)	little	>50%	>50%	>25%	no	25	medium (50-200)	Yellow/white/pink	N/A	Prunus africana Grevillea robusta,Hoslundia opposita,Melissa officinalis	little(<25%)
RE_CH20_F_200		CH20	F		24/9/2021	Forest		Humus rich (black)	medium	>25%	>75%	>75%	much	5	little (<50)	White	N/A	Tabanaemontana stapfiana,Syzygium guineense,Phoenix reclinata,Ochna holstii	much (<75%)
